# Supplementary material for: Low Concentration of Putative Anti-Auxin and Anti-Fungal Agent Accelerates the PLB Organogenesis of <em>Dendrobium okinawense</em> Under Green LED
Source: Preprints.org preprint supplement (doi:10.20944/preprints202107.0025.v1), 2021-07-01
Supplement: Supplementary file 1 [file supplementary]

**Table S1. Effectiveness of different concentrations of sucrose for PLB organogenesis of *D. okinawense***

| Sucrose (g/L) | Mean number of PLBs | Fresh weight (mg) | Mean number of shoots | PLBs formation rate |
|---------------|---------------------|-------------------|-----------------------|---------------------|
| 0             | 3.20 c ± 0.26       | 26.83 d ± 1.74    | 0.47 ± 0.16           | 100%                |
| 5             | 5.12 ab ± 0.35      | 76.16 bc ± 5.77   | 1.12 ± 0.22           | 100%                |
| 10            | 5.60 a ± 0.45       | 98.97 a ± 7.23    | 1.83 ± 0.29           | 100%                |
| 20            | 5.17 a ± 0.39       | 80.13 ab ± 6.54   | 0.90 ± 0.19           | 100%                |
| 30            | 5.33 a ± 0.49       | 60.00 bc ± 5.48   | 1.30 ± 0.25           | 100%                |
| 40            | 3.33 bc ± 0.23      | 54.80 c ± 3.00    | 1.13 ± 0.23           | 100%                |

Here; n, number of PLB cultured as explant; letters in the column, those share a letter are statistically identical and those do not share are statistically different at  $p \leq 0.05$ . (total number of explants, n=30)
